# Supplementary material for: Identification of lncRNAs involved in rice ovule development and female gametophyte abortion by genome-wide screening and functional analysis
Source: BMC Genomics. 2019 Jan 28;20:90. doi: 10.1186/s12864-019-5442-6 (PMC6348626; doi:10.1186/s12864-019-5442-6)
Supplement: Supplementary file 6 — Table S6. The GO terms which were enriched by coherent target genes of differentially expressed lncRNAs in different comparisons. (XLSX 21 kb) [file 12864_2019_5442_MOESM6_ESM.xlsx]

## Sheet: Sheet1
	Table S6 The GO terms which were enriched by coherant target genes of differentially expressed lncRNAs in different comparisons.Ml represented meaningless. If P-value ≤0.05, the GO term was defined as significantly enriched GO term.
	GO Term	the number of target genes enriched in Gui99	the number of target genes enriched in fsv1	P-value
	Cellular Component
	cell	206	228	0.001
	cell part	206	228	0.001
	intracellular part	191	214	0.001
	intracellular	193	216	0.001
	envelope	11	7	MI
	oxidoreductase complex	1	1	MI
	plasma membrane part	2	3	MI
	plasma membrane	15	18	MI
	cell periphery	20	23	MI
	endomembrane system	16	18	MI
	protein serine/threonine phosphatase complex	0	1	MI
	external encapsulating structure	2	3	MI
	nuclear outer membrane-endoplasmic reticulum membrane network	3	6	0.001
	organelle	168	190	0.001
	intracellular organelle	168	190	0.001
	membrane-bounded organelle	162	183	0.001
	organelle part	36	44	MI
	non-membrane-bounded organelle	15	25	MI
	intracellular organelle part	36	44	0.001
	organelle membrane	9	10	MI
	organelle lumen	9	13	MI
	organellar ribosome	1	3	MI
	intrinsic component of organelle membrane	2	1	MI
	membrane part	74	78	0.001
	respiratory chain	1	1	MI
	mitochondrial membrane part	4	2	MI
	membrane protein complex	2	2	MI
	intrinsic component of membrane	71	74	0.001
	endoplasmic reticulum membrane	3	6	MI
	membrane	90	102	0.001
	whole membrane	5	6	MI
	photosynthetic membrane	0	1	MI
	outer membrane	1	0	MI
	protein-containing complex	36	42	0.001
	catalytic complex	14	15	MI
	mitochondrial protein complex	2	3	MI
	microtubule associated complex	1	1	MI
	ribonucleoprotein complex	15	21	MI
	transcription elongation factor complex	1	1	MI
	nuclear pore	3	2	MI
	CCR4-NOT complex	2	2	MI
	CCR4-NOT core complex	2	2	MI
	integrator complex	0	1	MI
	Sm-like protein family complex	1	2	MI
	nuclear pore cytoplasmic filaments	2	2	MI
	protein-DNA complex	1	1	MI
	DNA packaging complex	1	1	MI
	tethering complex	3	2	MI
	DNA topoisomerase complex (ATP-hydrolyzing)	1	1	MI
	origin recognition complex	1	1	MI
	supramolecular complex	0	1	MI
	supramolecular polymer	0	1	MI
	membrane-enclosed lumen	9	13	MI
	extracellular region	4	8	MI
	apoplast	0	1	MI
	extracellular region part	0	2	MI
	extracellular space	0	2	MI
	symplast	0	1	MI
	plasmodesma	0	1	MI
	cell junction	0	1	MI
	cell-cell junction	0	1	MI
	virion	1	0	MI
	virion part	1	0	MI
	viral capsid	1	0	MI
	viral nucleocapsid	1	0	MI
	Molecular function
	catalytic activity	141	171	0.001
	hydrolase activity	83	103	0.001
	oxidoreductase activity	9	10	0.001
	transferase activity	76	89	0.001
	catalytic activity, acting on a protein	75	94	0.001
	lyase activity	4	5	MI
	catalytic activity, acting on DNA	41	48	0.001
	ligase activity	6	5	MI
	catalytic activity, acting on RNA	8	11	MI
	isomerase activity	3	8	MI
	binding	199	224	0.001
	heterocyclic compound binding	164	187	0.001
	organic cyclic compound binding	164	187	0.001
	ion binding	128	144	0.001
	protein binding	15	15	MI
	small molecule binding	41	46	0.001
	carbohydrate derivative binding	32	36	0.001
	carbohydrate binding	3	5	MI
	pattern binding	1	1	MI
	chromatin binding	1	1	MI
	cofactor binding	8	7	MI
	protein-containing complex binding	0	1	MI
	sulfur compound binding	2	1	MI
	drug binding	29	33	MI
	hormone binding	0	1	MI
	alkene binding	0	1	MI
	lipid binding	3	3	MI
	amide binding	3	2	MI
	structural molecule activity	12	15	MI
	structural constituent of nuclear pore	2	2	MI
	structural constituent of ribosome	10	13	MI
	transporter activity	16	19	MI
	transmembrane transporter activity	14	18	MI
	protein transporter activity	2	2	MI
	transcription regulator activity	3	3	MI
	transcription factor activity, protein binding	0	1	MI
	DNA binding transcription factor activity	3	2	MI
	molecular function regulator	1	2	MI
	enzyme regulator activity	1	2	MI
	signal transducer activity	1	2	MI
	molecular transducer activity	1	0	MI
	signal transducer activity, downstream of receptor	0	2	MI
	Biological process			MI
	localization	37	30	MI
	establishment of localization	37	30	MI
	macromolecule localization	12	7	MI
	cellular localization	12	4	MI
	protein-containing complex localization	3	2	MI
	regulation of localization	1	1	MI
	response to stimulus	21	30	0.001
	response to chemical	11	15	MI
	cellular response to stimulus	14	22	MI
	response to stress	8	10	MI
	response to abiotic stimulus	1	3	MI
	detection of stimulus	0	1	MI
	response to biotic stimulus	1	1	MI
	response to external stimulus	2	1	MI
	response to endogenous stimulus	7	11	MI
	regulation of response to stimulus	1	2	MI
	negative regulation of response to stimulus	1	2	MI
	metabolic process	185	221	0.001
	organic substance metabolic process	176	209	0.001
	biosynthetic process	95	103	0.001
	cellular metabolic process	164	193	0.001
	primary metabolic process	170	203	0.001
	catabolic process	14	17	MI
	nitrogen compound metabolic process	159	189	0.001
	regulation of metabolic process	23	28	MI
	small molecule metabolic process	18	16	MI
	positive regulation of metabolic process	2	2	MI
	negative regulation of metabolic process	5	6	MI
	oxidation-reduction process	10	11	MI
	secondary metabolic process	2	3	MI
	methylation	2	1	MI
	hormone metabolic process	2	0	MI
	cellular process	191	221	0.001
	regulation of cellular process	28	35	MI
	cell wall organization or biogenesis	2	5	MI
	cell cycle	6	5	MI
	cell cycle checkpoint	1	1	MI
	negative regulation of cellular process	4	5	MI
	cell communication	9	15	MI
	signal transduction	9	15	MI
	positive regulation of cellular process	3	3	MI
	cellular component organization	17	28	MI
	process utilizing autophagic mechanism	1	1	MI
	cell division	5	4	MI
	cellular developmental process	2	4	MI
	secretion by cell	5	2	MI
	cell growth	2	2	MI
	protein folding	1	4	MI
	cellular homeostasis	2	2	MI
	gene silencing	1	2	MI
	cell cycle process	4	4	MI
	microtubule-based process	1	2	MI
	movement of cell or subcellular component	0	1	MI
	cellular potassium ion transport	4	4	MI
	chromosome segregation	2	2	MI
	stomatal movement	1	0	MI
	exocytic process	2	0	MI
	developmental process	12	11	MI
	anatomical structure development	12	10	MI
	developmental process involved in reproduction	6	5	MI
	regulation of developmental process	3	3	MI
	developmental growth	3	2	MI
	anatomical structure formation involved in morphogenesis	0	1	MI
	anatomical structure morphogenesis	4	4	MI
	positive regulation of developmental process	1	0	MI
	maintenance of cell number	1	1	MI
	anatomical structure arrangement	2	2	MI
	meristem initiation	1	1	MI
	multicellular organismal process	11	10	MI
	multicellular organism development	10	9	MI
	post-embryonic development	6	6	MI
	regulation of multicellular organismal process	1	0	MI
	meristem maintenance	3	2	MI
	pattern specification process	1	1	MI
	positive regulation of multicellular organismal process	1	0	MI
	stem cell population maintenance	1	1	MI
	megagametogenesis	0	1	MI
	multi-multicellular organism process	1	0	MI
	regulation of biological process	33	42	0.001
	negative regulation of biological process	7	9	MI
	positive regulation of biological process	4	3	MI
	regulation of growth	3	2	MI
	regulation of reproductive process	1	0	MI
	regulation of signaling	0	1	MI
	regulation of multi-organism process	1	1	MI
	biological regulation	41	47	0.001
	regulation of biological quality	8	3	MI
	regulation of molecular function	0	1	MI
	reproductive process	6	5	MI
	positive regulation of reproductive process	1	0	MI
	pollination	1	0	MI
	pollen tube guidance	1	0	MI
	reproduction	6	5	MI
	negative regulation of signaling	0	1	MI
	negative regulation of multi-organism process	1	1	MI
	signaling	9	15	MI
	positive regulation of growth	1	1	MI
	growth	4	3	MI
	cellular component biogenesis	6	10	MI
	rhythmic process	1	0	MI
	circadian rhythm	1	0	MI
	multi-organism process	2	2	MI
	response to other organism	1	1	MI
	interspecies interaction between organisms	0	1	MI
	locomotion	1	0	MI
	taxis	1	0	MI
	GO Term	the number of target genes enriched at stage 1	the number of target genes enriched at stage 2	the number of target genes enriched at stage 3	P-value
	Cellular Component
	cell	17	35	40	0.001
	cell part	17	35	40	0.001
	intracellular part	17	30	38	0.001
	intracellular	17	30	38	0.001
	endomembrane system	5	3	7	MI
	envelope	3	2	3	MI
	nuclear outer membrane-endoplasmic reticulum membrane network	0	1	2	MI
	cell periphery	0	6	6	MI
	plasma membrane	0	6	5	MI
	plasma membrane part	0	2	1	MI
	organelle	15	27	34	0.001
	intracellular organelle	15	27	34	0.001
	organelle part	6	10	10	MI
	non-membrane-bounded organelle	4	3	8	MI
	membrane-bounded organelle	13	26	33	0.001
	protein-containing complex	7	6	12	MI
	ribonucleoprotein complex	2	2	5	MI
	nuclear pore cytoplasmic filaments	2	0	2	MI
	nuclear pore	2	0	2	MI
	eukaryotic translation elongation factor 1 complex	0	1	0	MI
	protein-DNA complex	1	0	1	MI
	catalytic complex	2	2	3	MI
	mediator complex	0	1	0	MI
	membrane protein complex	0	1	0	MI
	mitochondrial protein complex	0	0	2	MI
	DNA packaging complex	0	0	1	MI
	origin recognition complex	0	1	0	MI
	tethering complex	0	0	1	MI
	intracellular organelle part	6	10	10	MI
	organelle membrane	1	6	1	MI
	organelle lumen	0	4	3	MI
	organellar ribosome	0	0	2	MI
	membrane	5	18	12	0.252
	whole membrane	0	4	1	MI
	membrane part	4	14	9	MI
	endoplasmic reticulum membrane	0	1	2	MI
	extracellular region	1	2	4	MI
	extracellular region part	0	0	1	MI
	membrane-enclosed lumen	0	4	3	MI
	intrinsic component of membrane	4	13	9	MI
	respiratory chain	0	1	0	MI
	mitochondrial membrane part	0	1	0	MI
	extracellular space	0	0	1	MI
	Molecular function
	binding	9	25	27	MI
	drug binding	1	7	3	MI
	carbohydrate derivative binding	1	7	3	MI
	organic cyclic compound binding	8	22	21	MI
	heterocyclic compound binding	8	22	21	MI
	ion binding	2	12	8	MI
	protein binding	2	1	2	MI
	cofactor binding	1	1	1	MI
	small molecule binding	2	8	8	MI
	lipid binding	0	1	2	MI
	carbohydrate binding	0	0	1	MI
	amide binding	2	0	2	MI
	catalytic activity	8	13	15	MI
	transferase activity	3	4	1	MI
	catalytic activity, acting on DNA	0	2	1	MI
	oxidoreductase activity	1	1	2	MI
	isomerase activity	2	0	0	MI
	hydrolase activity	2	10	12	MI
	catalytic activity, acting on a protein	0	5	6	MI
	catalytic activity, acting on RNA	1	0	0	MI
	lyase activity	0	0	1	MI
	transporter activity	0	7	2	MI
	transmembrane transporter activity	0	6	2	MI
	protein transporter activity	0	2	0	MI
	structural molecule activity	3	2	7	MI
	structural constituent of ribosome	1	2	5	MI
	structural constituent of nuclear pore	2	0	2	MI
	Biological process
	localization	2	7	8	MI
	maintenance of location	0	0	1	MI
	macromolecule localization	2	2	3	MI
	cellular localization	2	0	3	MI
	establishment of localization	2	7	7	MI
	regulation of localization	0	2	1	MI
	biological regulation	1	5	6	MI
	regulation of biological quality	0	1	3	MI
	regulation of biological process	1	5	4	MI
	metabolic process	6	20	19	MI
	organic substance metabolic process	5	18	18	MI
	nitrogen compound metabolic process	4	17	16	MI
	cellular metabolic process	5	18	15	MI
	primary metabolic process	5	18	18	MI
	small molecule metabolic process	1	1	0	MI
	oxidation-reduction process	1	1	2	MI
	catabolic process	2	5	5	MI
	biosynthetic process	4	8	7	MI
	regulation of metabolic process	1	1	2	MI
	negative regulation of metabolic process	0	0	1	MI
	methylation	0	1	0	MI
	cellular process	7	25	21	MI
	cellular component organization	3	6	9	MI
	secretion by cell	0	0	2	MI
	cell growth	0	0	1	MI
	cellular developmental process	0	1	1	MI
	process utilizing autophagic mechanism	0	2	0	MI
	cell death	0	1	0	MI
	cellular potassium ion transport	0	1	1	MI
	protein folding	0	1	0	MI
	cellular homeostasis	0	0	1	MI
	regulation of cellular process	1	2	2	MI
	negative regulation of cellular process	0	0	1	MI
	gene silencing	0	0	1	MI
	cell wall organization or biogenesis	1	0	1	MI
	signal transduction	0	1	0	MI
	cellular response to stimulus	0	1	1	MI
	cell communication	0	1	0	MI
	exocytic process	0	0	1	MI
	membrane docking	0	0	1	MI
	cellular component organization or biogenesis	3	6	9	MI
	cellular component biogenesis	1	1	4	MI
	growth	0	1	2	MI
	developmental growth	0	1	2	MI
	regulation of growth	0	1	1	MI
	developmental process	0	2	2	MI
	anatomical structure development	0	2	2	MI
	anatomical structure morphogenesis	0	1	2	MI
	anatomical structure arrangement	0	1	2	MI
	meristem initiation	0	1	1	MI
	regulation of developmental process	0	1	1	MI
	developmental process involved in reproduction	0	1	1	MI
	maintenance of cell number	0	0	1	MI
	negative regulation of biological process	0	0	1	MI
	multicellular organismal process	0	2	2	MI
	meristem maintenance	0	1	2	MI
	multicellular organism development	0	2	1	MI
	post-embryonic development	0	1	1	MI
	stem cell population maintenance	0	0	1	MI
	pattern specification process	0	1	1	MI
	reproductive process	0	1	1	MI
	reproduction	0	1	1	MI
	signaling	0	1	0	MI
	response to stimulus	0	3	1	MI
	response to stress	0	1	1	MI
	response to chemical	0	1	0	MI
